# Supplementary material
Source: publisher site journal article supplement (https://www.spandidos-publications.com/2506/downloadSupplementary)

Figure S1. Transfection efficiency of Ad-hTK1/hTIMP1 *in vivo* and *in vitro*. hTK1 and hTIMP1 protein expression levels in (A) rat heart following injection with Ad-hTK1/hTIMP1 and (B) CMVECs following transfection with Ad-hTK1/hTIMP1. Ad, adenovirus; hTK1, human tissue kallikrein 1; hTIMP1, human tissue inhibitors of matrix metalloproteinase 1; CMVEC, cardiac microvascular endothelial cells.

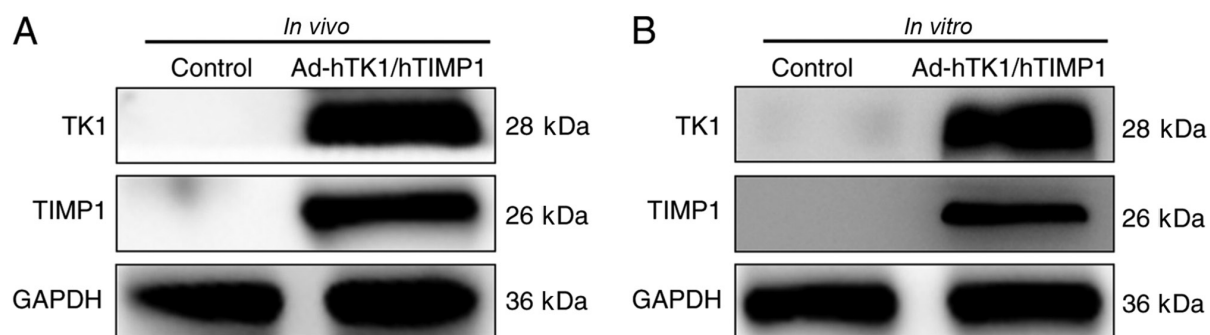

Supplement: Supplementary file 1 [file downloadSupplementary]
